# Supplementary material for: Fungal Osteomyelitis: A Systematic Review of Reported Cases
Source: MDPI journal article supplement (doi:10.3390/microorganisms11071828), 2023-07-17
Supplement: s1 [file s1]

**Supplementary Table S6.** Results of logistic regressions showing association of outcome (death, recovery, chronicity/recurrence) with variables of interest after elimination of articles of insufficient quality (54 in total, 3 for the death outcome, 32 for the recovery outcome, 1 for chronicity/recurrence outcome).

| Outcome: Death (n=50)      |       |               |                  |
|----------------------------|-------|---------------|------------------|
| Variable                   | OR    | 95%CI         | pvalue           |
| Surgical treatment         | 0.672 | [0.365 1.270] | 0.21             |
| Treatment duration, months | 0.543 | [0.413 0.679] | <b>&lt;0.001</b> |
| Time to diagnosis          |       |               |                  |
| 0 – 1 month                | 0.713 | [0.381 1.301] | 0.28             |
| 1 – 6 months               | 1.783 | [0.987 3.247] | 0.055            |
| > 6 months                 | 0.692 | [0.256 1.579] | 0.42             |
| Immunocompromised          | 1.612 | [0.874 3.089] | 0.135            |
| Site of infection          |       |               |                  |
| Basicranium                | 1.398 | [0.458 3.514] | 0.51             |
| Extremities (except foot)  | 0.496 | [0.228 0.986] | 0.058            |
| Foot                       | -     | -             | -                |
| Other cranium bones        | 2.21  | [0.983 4.619] | <b>0.042</b>     |
| Pelvis and hip             | 0.197 | [0.011 0.942] | 0.113            |
| Ribs and sternum           | 0.806 | [0.297 1.847] | 0.638            |
| Shoulder                   | 0.482 | [0.022 2.443] | 0.484            |
| Splanchnocranium           | 0.840 | [0.309 1.929] | 0.705            |
| Vertebrae                  | 1.698 | [0.898 3.131] | 0.094            |
| Etiological agents         |       |               |                  |
| <i>Aspergillus</i>         | 2.713 | [1.484 4.950] | <b>0.001</b>     |
| <i>Blastomyces</i>         | -     | -             | -                |
| <i>Candida</i>             | 0.692 | [0.292 1.457] | 0.364            |
| <i>Coccidioides</i>        | 0.426 | [0.023 2.135] | 0.412            |
| <i>Cryptococcus</i>        | 0.432 | [0.127 1.109] | 0.119            |
| <i>Fusarium</i>            | 4.965 | [0.993 20.89] | <b>0.031</b>     |
| <i>Histoplasma</i>         | 0.649 | [0.035 3.406] | 0.682            |
| <i>Mucormycosis</i>        | 1.356 | [0.492 3.191] | 0.516            |
| <i>Paracoccidioides</i>    | -     | -             | -                |
| <i>Phaeohyphomycosis</i>   | -     | -             | -                |
| <i>Scedosporium</i>        | 0.803 | [0.187 2.376] | 0.726            |
| Other                      | 1.322 | [0.301 4.094] | 0.663            |
| Outcome: Recovery (n=367)  |       |               |                  |
| Variable                   | OR    | 95%CI         | pvalue           |
| Surgical treatment         | 1.490 | [0.874 2.501] | 136              |
| Treatment duration, months | 1.141 | [1.057 1.248] | <b>0.002</b>     |

**Supplementary Table S6.** Results of logistic regressions showing association of outcome (death, recovery, chronicity/recurrence) with variables of interest after elimination of articles of insufficient quality (54 in total, 3 for the death outcome, 32 for the recovery outcome, 1 for chronicity/recurrence outcome).

|                                             |           |                |                  |
|---------------------------------------------|-----------|----------------|------------------|
| Time to diagnosis                           |           |                |                  |
| 0 – 1 month                                 | 1.058     | [0.643 1.756]  | 0.825            |
| 1 – 6 months                                | 0.966     | [0.587 1.604]  | 0.894            |
| > 6 months                                  | 0.886     | [0.469 1.780]  | 0.722            |
| Immunocompromised                           | 0.780     | [0.464 1.291]  | 0.34             |
| Site of infection                           |           |                |                  |
| Basicranium                                 | 0.782     | [0.344 2.016]  | 0.581            |
| Extremities (except foot)                   | 1.644     | [0.945 2.981]  | 0.088            |
| Foot                                        | 6.434     | [1.343 115.55] | 0.069            |
| Other cranium bones                         | 0.616     | [0.312 1.288]  | 0.176            |
| Pelvis and hip                              | 1.402     | [0.575 4.207]  | 0.496            |
| Ribs and sternum                            | 0.860     | [0.446 1.773]  | 0.667            |
| Shoulder                                    | 0.965     | [0.305 4.262]  | 0.956            |
| Splanchnocranium                            | 1.065     | [0.533 2.322]  | 0.865            |
| Vertebrae                                   | 0.503     | [0.301 0.854]  | <b>0.009</b>     |
| Etiological agents                          |           |                |                  |
| <i>Aspergillus</i>                          | 0.651     | [0.388 1.111]  | 0.11             |
| <i>Blastomyces</i>                          | 3.868     | [0.780 70.124] | 0.191            |
| <i>Candida</i>                              | 0.995     | [0.554 1.875]  | 0.989            |
| <i>Coccidioides</i>                         | 0.767     | [0.269 2.750]  | 0.646            |
| <i>Cryptococcus</i>                         | 2.042     | [0.953 5.071]  | 0.089            |
| <i>Fusarium</i>                             | 0.268     | [0.057 1.384]  | 0.089            |
| <i>Histoplasma</i>                          | 2.535     | [0.488 46.537] | 0.375            |
| <i>Mucormycosis</i>                         | 0.867     | [0.402 2.089]  | 0.733            |
| <i>Paracoccidioides</i>                     | -         | -              | -                |
| <i>Phaeohiphomyces</i>                      | -         | -              | -                |
| <i>Scedosporium</i>                         | 0.889     | [0.375 2.459]  | 0.804            |
| Other                                       | 0.501     | [0.196 1.446]  | 0.168            |
| <b>Outcome: Recurrence/chronicity (n=6)</b> |           |                |                  |
| <b>Variable</b>                             | <b>OR</b> | <b>95%CI</b>   | <b>pvalue</b>    |
| Surgical treatment                          | 1.395     | [0.756 2.725]  | 0.305            |
| Treatment duration, months                  | 1.087     | [1.038 1.141]  | <b>&lt;0.001</b> |
| Time to diagnosis                           |           |                |                  |
| 0 – 1 month                                 | 0.865     | [0.491 1.501]  | 0.611            |
| 1 – 6 months                                | 0.513     | [0.275 0.917]  | <b>0.028</b>     |
| > 6 months                                  | 2.971     | [1.576 5.468]  | <b>&lt;0.001</b> |
| Immunocompromised                           | 0.66      | [0.383 1.137]  | 0.134            |

**Supplementary Table S6.** Results of logistic regressions showing association of outcome (death, recovery, chronicity/recurrence) with variables of interest after elimination of articles of insufficient quality (54 in total, 3 for the death outcome, 32 for the recovery outcome, 1 for chronicity/recurrence outcome).

|                           |       |                |              |
|---------------------------|-------|----------------|--------------|
| Site of infection         |       |                |              |
| Basicranium               | 0.371 | [0.059 1.267]  | 0.181        |
| Extremities (except foot) | 0.952 | [0.521 1.684]  | 0.87         |
| Foot                      | 0.922 | [0.265 2.469]  | 0.885        |
| Other cranium bones       | 1.022 | [0.403 2.258]  | 0.96         |
| Pelvis and hip            | 2.106 | [0.897 4.546]  | 0.068        |
| Ribs and sternum          | 1.626 | [0.779 3.183]  | 0.172        |
| Shoulder                  | 2.752 | [0.849 7.732]  | 0.066        |
| Splanchnocranium          | 1.098 | [0.481 2.226]  | 0.81         |
| Vertebrae                 | 1.586 | [0.878 2.798]  | 0.117        |
| Etiological agents        |       |                |              |
| <i>Aspergillus</i>        | 0.992 | [0.531 1.784]  | 0.982        |
| <i>Blastomyces</i>        | 0.727 | [0.113 2.627]  | 0.676        |
| <i>Candida</i>            | 1.160 | [0.589 2.167]  | 0.651        |
| <i>Coccidioides</i>       | 1.716 | [0.476 4.927]  | 0.352        |
| <i>Cryptococcus</i>       | 0.542 | [0.202 1.221]  | 0.175        |
| <i>Fusarium</i>           | 0.892 | [0.047 5.142]  | 0.916        |
| <i>Histoplasma</i>        | 4.174 | [1.224 12.96]  | <b>0.015</b> |
| <i>Mucormycosis</i>       | 0.832 | [0.277 2.032]  | 0.713        |
| <i>Paracoccidioides</i>   | -     | -              | -            |
| <i>Phaeohyphomycosis</i>  | 1.575 | [0.079 10.870] | 0.687        |
| <i>Scedosporium</i>       | 1.173 | [0.385 2.939]  | 0.752        |
| Other                     | 1.037 | [0.237 3.186]  | 0.954        |
