# Supplementary material for: Fungal Osteomyelitis: A Systematic Review of Reported Cases
Source: MDPI journal article supplement (doi:10.3390/microorganisms11071828), 2023-07-17
Supplement: s1 [file s1]

**Supplementary Table S5:** patients characteristics divided according to the etiological agent. Numerical variables are presented as median and range, while categorical variables as counts and percentage. CGD: chronic granulomatous disease; CVC: central venous catheter; IDU: intravenous drug users.

|                             | Etiological agent             |                              |                           |                               |                               |
|-----------------------------|-------------------------------|------------------------------|---------------------------|-------------------------------|-------------------------------|
|                             | <i>Aspergillus</i><br>N = 414 | <i>Blastomyces</i><br>N = 47 | <i>Candida</i><br>N = 294 | <i>Coccidioides</i><br>N = 82 | <i>Cryptococcus</i><br>N = 93 |
| Age, years                  | 45 [22 - 63]                  | 28 [15 - 43]                 | 53 [37.3 - 66.7]          | 32 [23.7 - 46]                | 46 [33 - 62]                  |
| Gender                      |                               |                              |                           |                               |                               |
| Male                        | 295 (71.2)                    | 29 (61.7)                    | 192 (65.3)                | 64 (78)                       | 56 (60.2)                     |
| Female                      | 119 (28.7)                    | 18 (38.3)                    | 102 (34.7)                | 18 (22)                       | 37 (39.8)                     |
| Site of infection           |                               |                              |                           |                               |                               |
| Basicranium                 | 30 (7.4)                      | 2 (4.2)                      | 9 (3.1)                   | -                             | 2 (2.1)                       |
| Extremities (no foot)       | 68 (16.4)                     | 28 (59.6)                    | 39 (13.3)                 | 38 (46.3)                     | 33 (35.5)                     |
| Foot                        | 9 (2.2)                       | 3 (6.4)                      | 5 (1.7)                   | 8 (9.7)                       | 4 (4.3)                       |
| Other cranium bones         | 42 (10.1)                     | 8 (17)                       | 11 (3.7)                  | 4 (4.9)                       | 12 (12.9)                     |
| Pelvis and hip              | 14 (3.4)                      | -                            | 20 (6.8)                  | 13 (15.3)                     | 6 (6.4)                       |
| Ribs and sternum            | 53 (12.8)                     | 1 (2.1)                      | 25 (8.5)                  | 14 (17.1)                     | 18 (19.3)                     |
| Shoulder                    | 8 (1.9)                       | -                            | 4 (1.4)                   | 6 (7.3)                       | 7 (7.5)                       |
| Splanchnocranium            | 149 (36)                      | 1 (2.1)                      | 68 (23.1)                 | 5 (6.1)                       | 4 (4.3)                       |
| Vertebrae                   | 125 (30.2)                    | 16 (34)                      | 138 (46.9)                | 29 (35.4)                     | 23 (24.7)                     |
| Risk factors                |                               |                              |                           |                               |                               |
| Bedsore                     |                               |                              |                           |                               |                               |
| CGD                         | 3 (0.7)                       | -                            | 4 (1.4)                   | -                             | 1 (1.1)                       |
| COVID-19                    | 13 (3.1)                      | -                            | -                         | -                             | -                             |
| CVC                         | 40 (9.7)                      | -                            | 39 (13.3)                 | -                             | -                             |
| Diabetes mellitus           | 23 (5.5)                      | -                            | 64 (21.8)                 | -                             | -                             |
| Fungal infection<br>elsew.  | 121 (29.2)                    | 1 (2.1)                      | 87 (29.6)                 | 1 (1.2)                       | 19 (20.4)                     |
| Fungemia                    | 84 (20.3)                     | 16 (34)                      | 63 (21.4)                 | 32 (39)                       | 19 (20.4)                     |
| HIV                         | 26 (6.3)                      | -                            | 49 (16.7)                 | 1 (1.2)                       | 4 (4.3)                       |
| Hospitalised < 6<br>months  | 6 (1.4)                       | -                            | 8 (2.7)                   | -                             | 4 (4.3)                       |
| IDU                         | 45 (10.9)                     | 4 (8.5)                      | 56 (19)                   | 2 (2.4)                       | 9 (9.7)                       |
| Oncohaematological          | 16 (3.9)                      | 1 (2.1)                      | 30 (10.2)                 | -                             | 1 (1.1)                       |
| Other immunodepr.           | 81 (19.6)                     | -                            | 66 (22.4)                 | 3 (3.6)                       | 8 (8.6)                       |
| Parental nutrition          | 78 (18.8)                     | 1 (2.1)                      | 62 (21.1)                 | 7 (8.5)                       | 24 (25.8)                     |
| Prosthesis                  | 5 (1.2)                       | -                            | 21 (7.1)                  | -                             | -                             |
| Transplanted                | 7 (1.7)                       | 1 (2.1)                      | 17 (5.8)                  | 1 (1.2)                       | -                             |
| Surgery / local lesion      | 52 (12.6)                     | -                            | 24 (8.2)                  | 1 (1.2)                       | 8 (8.6)                       |
|                             | 104 (25.1)                    | 8 (17)                       | 95 (32.3)                 | 9 (10.9)                      | 14 (15.1)                     |
| Diagnosis                   |                               |                              |                           |                               |                               |
| Empirical                   |                               |                              |                           |                               |                               |
| Isolation                   | 5 (1.2)                       | 2 (4.2)                      | 4 (1.4)                   | -                             | -                             |
| Histological                | 319 (77.1)                    | 43 (91.5)                    | 258 (87.7)                | 79 (96)                       | 91 (97.8)                     |
| Other microbiological<br>m. | 325 (78.5)                    | 40 (85.1)                    | 203 (69)                  | 65 (79.3)                     | 78 (83.9)                     |
| Radiological                | 30 (7.2)                      | -                            | 10 (3.4)                  | 42 (51.2)                     | 41 (44.1)                     |
|                             | 280 (67.6)                    | 43 (91.5)                    | 228 (77.6)                | 72 (87.8)                     | 86 (92.5)                     |
| Time to diagnosis           |                               |                              |                           |                               |                               |
| 0 – 1 month                 | 80 (19.3)                     | 12 (25.5)                    | 56 (19)                   | 14 (17.1)                     | 32 (34.4)                     |
| 1 – 6 months                | 128 (30.9)                    | 16 (34)                      | 148 (50.3)                | 34 (41.5)                     | 47 (50.5)                     |
| > 6 months                  | 32 (7.7)                      | 5 (10.6)                     | 18 (6.1)                  | 7 (8.5)                       | 10 (10.7)                     |
| Outcome                     |                               |                              |                           |                               |                               |
| Death                       | 65 (15.7)                     | -                            | 32 (10.9)                 | 3 (3.6)                       | 7 (7.5)                       |
| Recovery                    | 304 (63.4)                    | 44 (93.6)                    | 212 (72.1)                | 50 (61)                       | 81 (87.1)                     |
| Recurrence/chronicity       | 55 (13.3)                     | 3 (6.4)                      | 29 (9.9)                  | 10 (12.2)                     | 6 (6.5)                       |
| Treatment                   |                               |                              |                           |                               |                               |
| Duration, months            |                               |                              |                           |                               |                               |
| Antifungal 1                | 4 [0 36], 4*                  | 6 [0.25 24]                  | 3 [0 16], 3*              | 4.5 [0.75 29], 5*             | 3.5 [0.25 24], 3*             |
| Antifungal ≥2               | 327 (79)                      | 47 (100)                     | 192 (65.3)                | 58 (70.7)                     | 88 (94.6)                     |
| Empirical                   | 225 (54.3)                    | 36 (76.6)                    | 113 (38.4)                | 43 (52.4)                     | 48 (51.6)                     |
| Surgery                     | 12 (2.9)                      | 2 (4.2)                      | 4 (1.4)                   | 1 (1.2)                       | 1 (1.1)                       |
|                             | 315 (76.1)                    | 29 (61.7)                    | 182 (61.9)                | 34 (41.5)                     | 59 (63.4)                     |

Supplementary Table S5: continue.

|                          | Etiological agent         |                              |                                |                                   |                                   |
|--------------------------|---------------------------|------------------------------|--------------------------------|-----------------------------------|-----------------------------------|
|                          | <i>Fusarium</i><br>N = 44 | <i>Histoplasma</i><br>N = 14 | <i>Mucormycosis</i><br>N = 240 | <i>Paracoccidioides</i><br>N = 31 | <i>Phaeohyphomycosis</i><br>N = 5 |
| Age, years               | 40 [18.5 - 55]            | 31.5 [19 - 51.7]             | 49 [37 - 60]                   | 37 [21 - 47]                      | 36 [34 - 61]                      |
| Gender                   |                           |                              |                                |                                   |                                   |
| Male                     | 27 (61.4)                 | 9 (64.3)                     | 172 (71.7)                     | 22 (71)                           | 2 (40)                            |
| Female                   | 17 (38.6)                 | 5 (35.7)                     | 68 (28.3)                      | 9 (29)                            | 3 (60)                            |
| Site of infection        |                           |                              |                                |                                   |                                   |
| Basicranium              | 1 (2.3)                   | -                            | 22 (9.2)                       | -                                 | 1 (20)                            |
| Extremities (no foot)    | 12 (27.3)                 | 14 (100)                     | 23 (9.6)                       | 16 (51.6)                         | 3 (60)                            |
| Foot                     | 8 (18.2)                  | 1 (7.1)                      | 5 (2.1)                        | 1 (3.2)                           | 1 (20)                            |
| Other cranium bones      | 5 (11.4)                  | 1 (7.1)                      | 22 (9.2)                       | -                                 | -                                 |
| Pelvis and hip           | -                         | 3 (21.4)                     | 1 (0.4)                        | 2 (6.4)                           | -                                 |
| Ribs and sternum         | -                         | 3 (21.4)                     | 1 (0.4)                        | 2 (6.4)                           | -                                 |
| Shoulder                 | -                         | -                            | -                              | 7 (22.6)                          | 1 (20)                            |
| Splanchnocranium         | 15 (34.1)                 | 1 (7.1)                      | 190 (79.2)                     | -                                 | -                                 |
| Vertebrae                | 7 (15.9)                  | 1 (7.1)                      | 10 (4.2)                       | 1 (3.2)                           | -                                 |
| Risk factors             |                           |                              |                                |                                   |                                   |
| Bedsore                  | 3 (6.8)                   | -                            | 3 (1.2)                        | -                                 | -                                 |
| CGD                      | 2 (4.5)                   | -                            | 1 (0.4)                        | -                                 | -                                 |
| COVID-19                 | -                         | -                            | 56 (23.3)                      | -                                 | -                                 |
| CVC                      | 18 (40.9)                 | -                            | 18 (7.5)                       | -                                 | -                                 |
| Diabetes mellitus        | 21 (47.7)                 | 1 (7.1)                      | 142 (59.2)                     | -                                 | 3 (60)                            |
| Fungal infection el sew. | 14 (31.8)                 | 3 (21.4)                     | 14 (5.8)                       | 19 (61.3)                         | 2 (40)                            |
| Fungemia                 | 12 (27.3)                 | 1 (7.1)                      | 9 (3.7)                        | -                                 | -                                 |
| HIV                      | -                         | 2 (14.3)                     | -                              | -                                 | -                                 |
| Hospitalised < 6 months  | 5 (11.4)                  | 4 (28.6)                     | 18 (7.5)                       | -                                 | 2 (40)                            |
| IDU                      | -                         | -                            | 2 (0.8)                        | -                                 | -                                 |
| Oncohaematological       | 33 (75)                   | 1 (7.1)                      | 36 (15)                        | -                                 | -                                 |
| Other immunodepr.        | 15 (34.1)                 | 2 (14.3)                     | 40 (16.7)                      | -                                 | 2 (40)                            |
| Parental nutrition       | 5 (11.4)                  | -                            | 4 (1.7)                        | -                                 | -                                 |
| Prosthesis               | 3 (6.8)                   | 3 (21.4)                     | 2 (0.8)                        | -                                 | -                                 |
| Transplanted             | 15 (34.1)                 | 2 (12.3)                     | 24 (10)                        | -                                 | 2 (40)                            |
| Surgery / local lesion   | 11 (25)                   | 5 (35.7)                     | 63 (26.2)                      | -                                 | 2 (40)                            |
| Diagnosis                |                           |                              |                                |                                   |                                   |
| Empirical                | 1 (2.3)                   | -                            | 8 (3.3)                        | -                                 | -                                 |
| Isolation                | 39 (88.6)                 | 12 (85.7)                    | 148 (61.7)                     | 10 (32.2)                         | 5 (100)                           |
| Istological              | 35 (79.5)                 | 13 (92.8)                    | 195 (81.2)                     | 13 (41.9)                         | 4 (80)                            |
| Other microbiological m. | -                         | 4 (28.6)                     | -                              | -                                 | -                                 |
| Radiological             | 13 (29.5)                 | 12 (85.7)                    | 122 (50.8)                     | 13 (41.9)                         | 5 (100)                           |
| Time to diagnosis        |                           |                              |                                |                                   |                                   |
| 0 – 1 month              | 6 (13.6)                  | 7 (50)                       | 48 (20)                        | 6 (19.3)                          | 3 (60)                            |
| 1 – 6 months             | 7 (15.9)                  | 2 (14.3)                     | 67 (27.9)                      | 3 (9.7)                           | -                                 |
| > 6 months               | 1 (2.3)                   | 4 (28.6)                     | 8 (3.3)                        | 2 (6.4)                           | 2 (40)                            |
| Outcome                  |                           |                              |                                |                                   |                                   |
| Death                    | 14 (31.8)                 | 1 (7.1)                      | 25 (10.4)                      | -                                 | -                                 |
| Recovery                 | 26 (59.1)                 | 13 (92.8)                    | 183 (76.2)                     | 10 (32.2)                         | 5 (100)                           |
| Recurrence/chronicity    | 1 (2.3)                   | 5 (35.7)                     | 14 (5.8)                       | -                                 | 1 (20)                            |
| Treatment                |                           |                              |                                |                                   |                                   |
| Duration, moths          | 2 [0.3 48]                | 8 [1 16], 4*                 | 3 [0 17], 2*                   | 12 [6 24]                         | 6 [6 12], 1*                      |
| Antifungal 1             | 16 (36.4)                 | 13 (92.8)                    | 138 (57.5)                     | 12 (38.7)                         | 4 (80)                            |
| Antifungal ≥2            | 7 (15.9)                  | 9 (64.3)                     | 100 (41.7)                     | -                                 | 3 (60)                            |
| Empirical                | 1 (2.3)                   | 1 (7.1)                      | 10 (4.2)                       | -                                 | 1 (20)                            |
| Surgery                  | 29 (65.9)                 | 9 (64.3)                     | 195 (81.2)                     | 1 (3.2)                           | 5 (100)                           |

**Supplementary Table S5: continue.**

|                          | Etiological agent             |                  |
|--------------------------|-------------------------------|------------------|
|                          | <i>Scedosporium</i><br>N = 77 | Other<br>N = 110 |
| Age, years               | 43 [21 - 57]                  | 46 [32.5 - 52]   |
| Gender                   |                               |                  |
| Male                     | 59 (64.9)                     | 81 (73.6)        |
| Female                   | 27 (35.1)                     | 29 (26.4)        |
| Site of infection        |                               |                  |
| Basicranium              | 4 (5.2)                       | 3 (2.7)          |
| Extremities (no foot)    | 20 (26)                       | 35 (31.8)        |
| Foot                     | 9 (11.7)                      | 5 (4.5)          |
| Other cranium bones      | 9 (11.7)                      | 6 (5.5)          |
| Pelvis and hip           | 1 (1.3)                       | 6 (5.5)          |
| Ribs and sternum         | 2 (2.6)                       | 3 (2.7)          |
| Shoulder                 | 2 (2.6)                       | 1 (0.9)          |
| Splanchnocranium         | 20 (26)                       | 58 (52.7)        |
| Vertebrae                | 24 (31.2)                     | 11 (10)          |
| Risk factors             |                               |                  |
| Bedsore                  | 3 (3.9)                       | 3 (2.7)          |
| CGD                      | 1 (1.3)                       | -                |
| COVID-19                 | -                             | 39 (35.5)        |
| CVC                      | 17 (22.1)                     | 18 (16.4)        |
| Diabetes mellitus        | 21 (27.3)                     | 54 (49.1)        |
| Fungal infection elsew.  | 24 (31.2)                     | 19 (17.3)        |
| Fungemia                 | 13 (16.9)                     | 11 (10)          |
| HIV                      | 1 (1.3)                       | 2 (1.8)          |
| Hospitalised < 6 months  | 10 (13)                       | 7 (6.4)          |
| IDU                      | 6 (7.8)                       | -                |
| Oncohaematological       | 33 (42.9)                     | 32 (29.1)        |
| Other immunodepr.        | 16 (20.8)                     | 20 (19.2)        |
| Parental nutrition       | 4 (5.2)                       | 5 (4.5)          |
| Prosthesis               | 3 (3.9)                       | 4 (3.6)          |
| Transplanted             | 22 (28.6)                     | 17 (15.5)        |
| Surgery / local lesion   | 21 (27.3)                     | 14 (12.7)        |
| Diagnosis                |                               |                  |
| Empirical                | 2 (2.6)                       | 1 (0.9)          |
| Isolation                | 71 (92.2)                     | 102 (92.7)       |
| Istological              | 57 (74)                       | 94 (85.4)        |
| Other microbiological m. | 3 (3.9)                       | 8 (7.3)          |
| Radiological             | 47 (61)                       | 70 (63.6)        |
| Time to diagnosis        |                               |                  |
| 0 – 1 month              | 15 (19.5)                     | 19 (17.3)        |
| 1 – 6 months             | 29 (37.7)                     | 55 (50)          |
| > 6 months               | 6 (7.8)                       | 2 (1.8)          |
| Outcome                  |                               |                  |
| Death                    | 15 (19.5)                     | 15 (13.6)        |
| Recovery                 | 45 (58.4)                     | 84 (76.4)        |
| Recurrence/chronicity    | 6 (7.8)                       | 10 (9.1)         |
| Treatment                |                               |                  |
| Duration, moths          | 6 [0 24], 3*                  | 4 [0.5 24], 1*   |
| Antifungal 1             | 33 (42.8)                     | 41 (37.3)        |
| Antifungal ≥2            | 17 (22.1)                     | 25 (22.7)        |
| Empirical                | 5 (6.5)                       | 6 (5.5)          |
| Surgery                  | 48 (62.3)                     | 90 (81.8)        |

(\*) indicates how many patients require a chronic treatment.
